# Supplementary material for: Live cell molecular analysis of primary prostate cancer organoids identifies persistent androgen receptor signaling
Source: Med Oncol. 2021 Sep 28;38(11):135. doi: 10.1007/s12032-021-01582-y (PMC8478748; doi:10.1007/s12032-021-01582-y)
Supplement: Supplementary file 1 — Supplementary file1 (PDF 1906 kb) [file 12032_2021_1582_MOESM1_ESM.pdf]

## ONLINE RESOURCE

*Medical Oncology*

### **Live cell molecular analysis of primary prostate cancer organoids identifies persistent Androgen Receptor signaling**

Erika Heninger<sup>1</sup>, David Kosoff<sup>2</sup>, Tamara S. Rodems<sup>1</sup>, Nan Sethakorn<sup>2</sup>, Anupama Singh<sup>1</sup>, Harshitha Gungurthi<sup>1</sup>, Kristin Carlson<sup>1</sup>, Bing Yang<sup>3</sup>, Cole Gilsdorf<sup>1</sup>, Cheri A. Pasch<sup>1</sup>, Dustin A. Deming<sup>2</sup>, Leigh Ellis<sup>4</sup>, David J. Beebe<sup>5</sup>, David F. Jarrard<sup>3</sup> and Joshua M. Lang<sup>1,2</sup>.

<sup>1</sup>University of Wisconsin Carbone Cancer Center, Madison, 1111 Highland Ave., <sup>2</sup>Department of Medicine, University of Wisconsin, Madison, 1111 Highland Ave., Madison, WI 53705, <sup>3</sup>Department of Urology, 1111 Highland Ave., Madison, WI 53705, <sup>4</sup>Division of Medical Oncology, Department of Medicine, Samuel Oschin Comprehensive Cancer Institute, Cedars-Sinai Medical Center 8700 Beverly Blvd, Los Angeles, CA 90048 <sup>5</sup>Department of Pathology and Laboratory Medicine, 1111 Highland Ave., Madison, WI 53705

To whom correspondence should be addressed: Joshua M. Lang, Email: [jmlang@medicine.wisc.edu](mailto:jmlang@medicine.wisc.edu)

| <b>Fluorescent Microscopy</b> |                       |                                    |
|-------------------------------|-----------------------|------------------------------------|
| <b>marker</b>                 | <b>fluorochrome</b>   | <b>purpose</b>                     |
| Hoechst                       | Hoechst 33342         | Nuclear stain                      |
| EpCAM                         | Alexa Fluor™ 488      | Epithelial marker                  |
| PSMA                          | PE                    | Prostate Specific Membrane Antigen |
| CD49f                         | Alexa Fluor™ 647      | Epithelial stratification          |
| CD45                          | PE                    | Leukocyte common antigen           |
| CD49a                         | Alexa Fluor™ 647      | Stromal marker                     |
|                               |                       |                                    |
| Androgen Receptor             | n/a                   | AR-pathway marker                  |
| Donkey Anti-Rabbit IgG        | PE                    | Secondary antibody                 |
| PSA                           | Cy5                   | Prostate Specific Antigen          |
| Live/Dead                     | Image-IT™ DEAD Green™ | Cell death detection               |

**Table S1** Multi-color immune fluorescent labeling assay reagents for confocal microscopy

| <b>Flow Cytometry Assay I</b> |                            |                                         |
|-------------------------------|----------------------------|-----------------------------------------|
| <b>marker</b>                 | <b>fluorochrome</b>        | <b>purpose</b>                          |
| Live/Dead fixable             | Ghost Dye™ 510             | Dead exclusion; reduce autofluorescence |
| Fc Block™                     | n/a                        | Reduce Fc-mediated antibody binding     |
| CD45                          | redFluor™ 710              | Leukocyte common antigen                |
| CD14                          | redFluor™ 710              | Monocyte/macrophage marker              |
| EpCAM                         | Brilliant Violet™ 650      | Epithelial marker                       |
| TROP2                         | PE                         | Epithelial marker                       |
| CD49f                         | PerCP Cy5.5                | Epithelial stratification               |
| Androgen Receptor             | n/a                        | AR-pathway marker                       |
| Donkey Anti-Rabbit IgG        | Alexa Fluor™ 488           | Secondary antibody                      |
| PSMA                          | PE-Cy7                     | Prostate Specific Membrane Antigen      |
| PSA                           | Cy5                        | Prostate Specific Antigen               |
| CD44                          | Brilliant UltraViolet™ 737 | Stemness marker                         |
| CD56                          | Brilliant UltraViolet™ 650 | Neuroendocrine marker                   |

**Table S2** Flow Cytometry antibodies utilized in Assay I

| <b>Flow Cytometry Assay II</b> |                     |                                         |
|--------------------------------|---------------------|-----------------------------------------|
| <b>marker</b>                  | <b>fluorochrome</b> | <b>purpose</b>                          |
| Live/Dead fixable              | Ghost Dye™ 510      | Dead exclusion; reduce autofluorescence |
| Fc Block™                      | n/a                 | Reduce Fc-mediated antibody binding     |
| CD45                           | PE                  | Leukocyte common antigen                |
| EpCAM                          | Alexa Fluor™ 488    | Epithelial marker                       |
| CD49a                          | PE-Cy7              | Stromal marker                          |

**Table S3** Flow Cytometry antibodies utilized in Assay II

| <b>Gene</b>   | <b>Forward Primer (5' - 3')</b> | <b>Internal Probe (5' - 3')</b> | <b>Reverse Primer (5' - 3')</b> |
|---------------|---------------------------------|---------------------------------|---------------------------------|
| <b>GSTP1</b>  | TTCGCTGCGCACACTTC               | CGGTCCTCTTCCTGCTGTCTGTTT        | CTTTCCTCTTTCCCAGGTC             |
| <b>RASSF1</b> | CCTCCAGAAACACGGGTA              | TTTGCGGTCGCCGTCGTTGT            | CTTCCTCCCTCCTTCGTC              |
| <b>APC</b>    | TTATTACTCTCCCTCCCACCTC          | TCTTGTGCTAATCCTTCTGCCCTGC       | TGGCAGTTGACACGCATAG             |
| <b>RARB</b>   | GAAGGAGAACTTGGGATCTT            | TTTCCAGGCTTGCTCGGCCAATC         | AGCCTGTAATTGATCCAAATGA          |
| <b>LINE1</b>  | CGCAGGCCAGTGTGTGT               | CCGTGCGCAAGCCGA                 | TCCCAGGTGAGGCAATGC              |

**Table S4** Primer and probe sequences used in qRT-PCR and pre-amplification of enriched methylated DNA

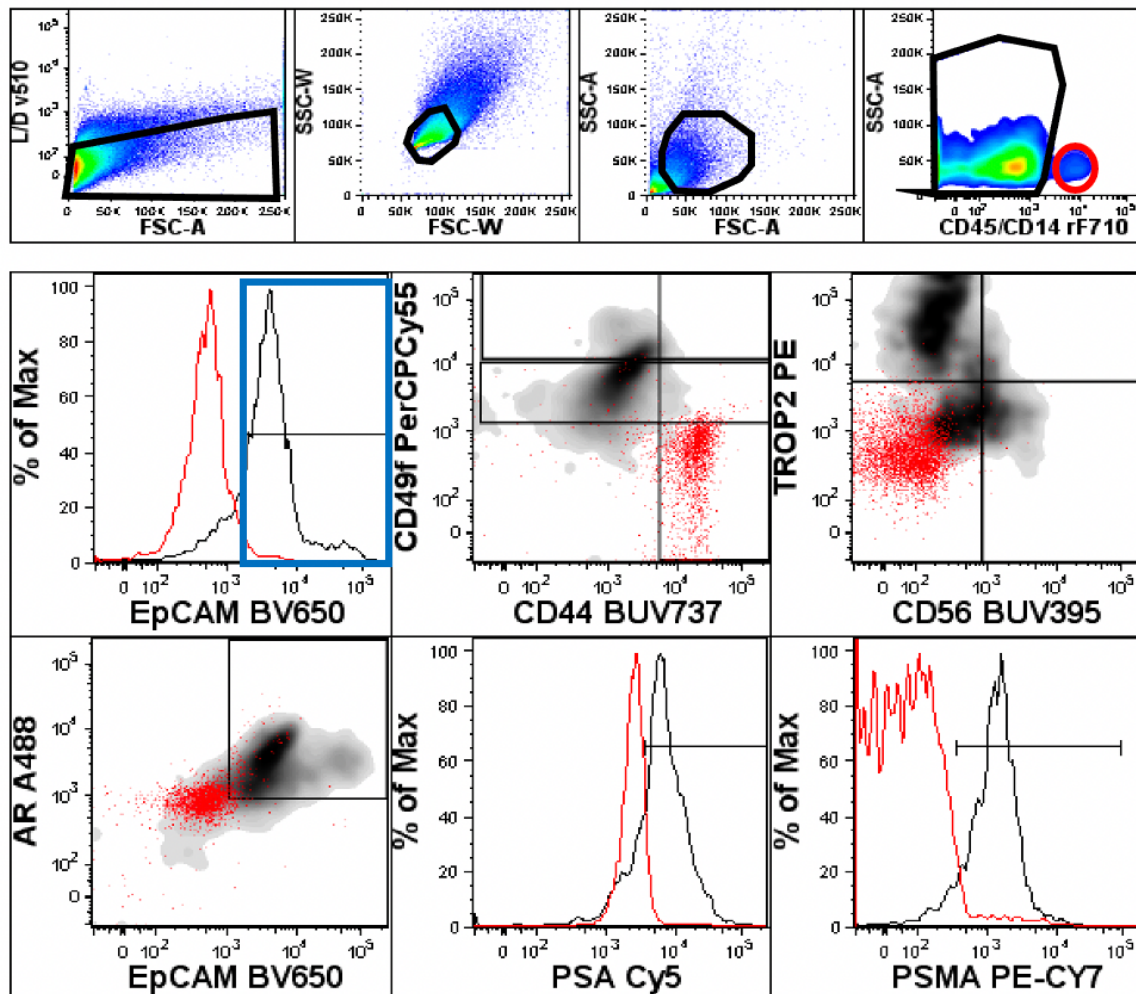

**Figure S1 Flow Cytometry Gating Strategy.** The live single epithelial cell content was extracted after excluding dead cells (live/dead stain negative; top row first plot), doublets (pulse Width low; top row second plot) and small cells/debris (top row third plot). EpCAM expression was then analyzed after exclusion of CD45<sup>+</sup> and CD14<sup>+</sup> immune cells (top right, red circle). The CD45<sup>+</sup>/CD14<sup>+</sup> cells served as an Internal Negative Control (red histogram overlay) to establish EpCAM expression in the CD45<sup>+</sup>/CD14<sup>+</sup> fraction (black histogram overlay (second row left). The EPCAM<sup>+</sup> cells (blue box on histogram) were then projected for analysis of epithelial and AR-pathway related features as shown in density plots (second row, middle, right) and on histograms (third row middle, right). AR expression is shown on the total CD45<sup>+</sup>/CD14<sup>+</sup> fraction on the density plot on bottom left. The red populations on both density plots and histograms represent the CD45<sup>+</sup>/CD14<sup>+</sup> INC control to confirm gating thresholds

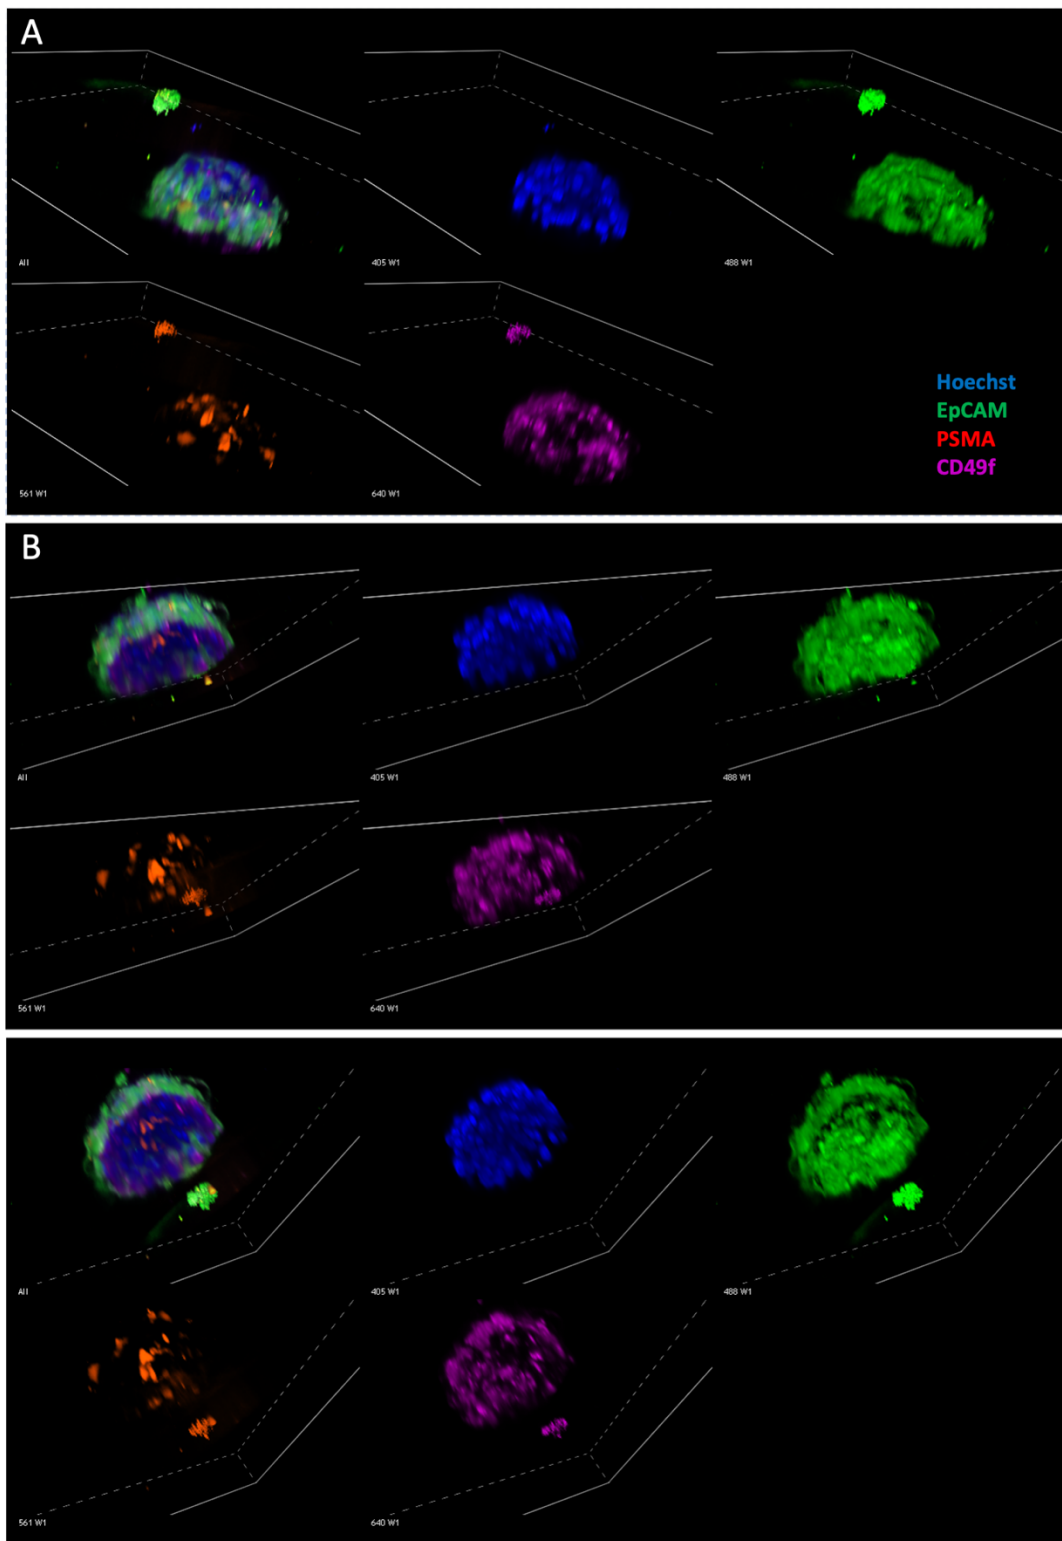

**Figure S2. Three-dimensional images of prostate PDCO.** Condensed three-dimensional images of PDCO shown in three different angles (a, b,c, respectively). Hoechst (blue), EpCAM (green), PSMA (red) and CD49f (purple).

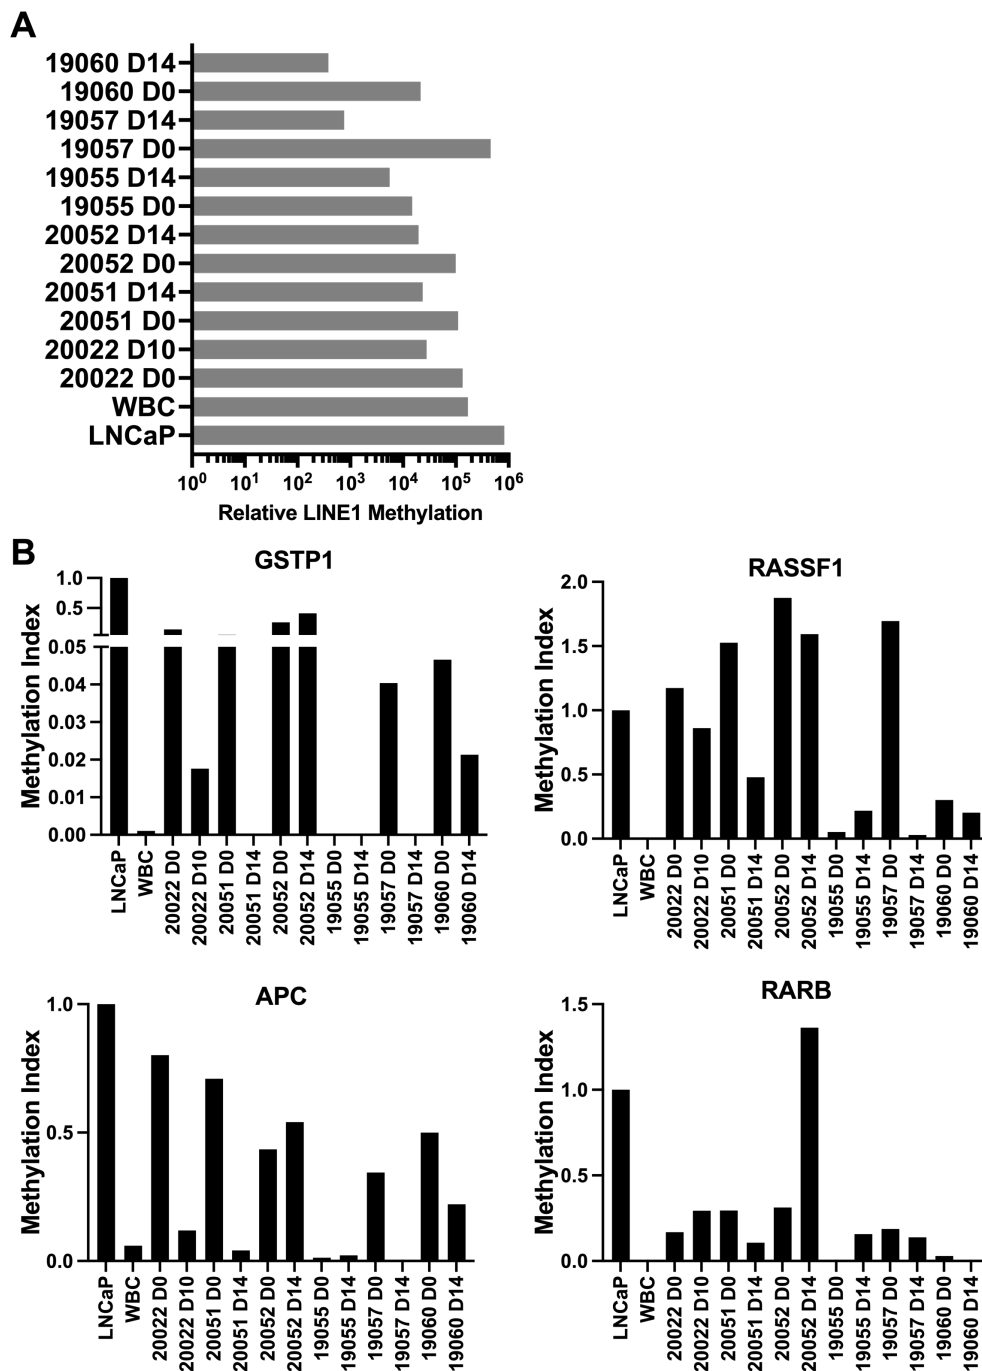

**Figure S3** (a) Relative *LINE1* methylation in primary biopsy (D0) and matched PDCA cultures (D10 or D14) after 10-14 days of *ex vivo* culture. LNCaP and WBC *LINE1* methylation is also included. (b) Methylation Index for *GSTP1*, *RASSF1*, *APC*, and *RARB* in primary biopsy (D0) and matched PDCA cultures (D10 or D14) after 10-14 days of culture. Data is the same as Figure 5 and represents individual core punches from radical prostatectomy specimens from the same donor. LNCaP and WBC represent positive and negative controls for promoter methylation at the genes, respectively
